# Supplementary material
Source: PubMed Central journal article supplement (PMC3604790)
Supplement: NIHMS441104-supplement-Supplementary_Material.pdf [file NIHMS441104-supplement-Supplementary_Material.pdf]

## SUPPLEMENTAL MATERIAL

### Single particle

At any time  $t$ , the position of the particle in the channel is described by the vector of probabilities  $p_i(t)$  to be at a particular site  $i$ :  $|p(t)\rangle = (p_1(t), \dots, p_i(t), \dots, p_N(t))$ , so that  $\langle i|p(t)\rangle = p_i(t)$ . The probabilities  $p_i(t)$  obey the following equations [1–3]

$$\frac{d}{dt}p_i(t) = r(p_{i-1} + p_{i+1} - 2p_i) \quad \text{for } 1 < i < N \quad (1)$$

with the boundary conditions

$$\frac{d}{dt}p_1(t) = -(r_o + r)p_1 + rp_2 \quad \text{and} \quad \frac{d}{dt}p_N(t) = -(r_o + r)p_N + rp_{N-1}. \quad (2)$$

Equations (1,2) can be written in a matrix form as

$$\frac{d}{dt}|p(t)\rangle = \hat{M} \cdot |p(t)\rangle, \quad (3)$$

with

$$M_{i,i} = -2r \quad \text{and} \quad M_{i,i\pm 1} = r \quad \text{for } 1 < i < N, \quad (4)$$

and

$$M_{1,1} = -r - r_o; \quad M_{N,N} = -r - r_o; \quad M_{1,2} = r; \quad M_{N,N-1} = r. \quad (5)$$

### Explicit solution of single particle equations in terms of matrix elements

Here we re-derive the solutions obtained in the Letter, using the standard methods of linear algebra [4]. Assume an arbitrary Markov process that can be in  $N$  states (such as defined by equation (3)). Time evolution of its probability distribution  $\vec{p}(t) = (p_1, p_2, \dots, p_N)$  and can be described by the following matrix equation (the equation (3) is an example):

$$\dot{\vec{p}} = \hat{U} \cdot \vec{p} \quad (6)$$

where  $\vec{p}$  is an  $N$ -dimensional vector, and  $\hat{U}$  is an  $N \times N$  matrix. Let us denote the eigenvalues of the matrix  $\hat{U}$  as  $\omega_1 \dots \omega_i \dots \omega_N$  and the corresponding eigenvectors as  $\vec{v}^1, \dots, \vec{v}^i, \dots, \vec{v}^N$ . Then the general solution is

$$\vec{p}(t) = \sum_{j=1}^N a_j \vec{v}^j e^{\omega_j t}, \quad (7)$$

where  $a_1 \dots a_N$  is a set of numerical coefficients. In other words,

$$p_i(t) = \sum_{j=1}^N a_j v_i^j e^{\omega_j t}. \quad (8)$$

The coefficients  $a_j$  can be determined from the initial condition:

$$p_i(0) = \sum_{j=1}^N a_j v_i^j, \quad (9)$$

which can be written as

$$\vec{p}(0) = \hat{V} \cdot \vec{a}, \quad (10)$$

where

$$\hat{V} = \begin{pmatrix} \vec{v}^1 \\ \dots \\ \vec{v}^i \\ \dots \\ \vec{v}^N \end{pmatrix}^T$$

so that  $V_{ij} = v_i^j$ . Finally

$$\vec{a} = \hat{V}^{-1} \cdot \vec{p}(0) \quad (11)$$

and

$$a_k = \sum_{j=1}^N (V^{-1})_{kj} p_j(0) \quad (12)$$

For the initial condition  $p_i(0) = \delta_{i,1}$ , we get  $a_k = (V^{-1})_{k1}$ . Now, the matrix  $U$  is diagonalized to its diagonal form

$$\hat{W} = \begin{pmatrix} w_1 & 0 & \dots & 0 \\ \dots & \dots & \dots & \dots \\ 0 & \dots & w_i & \dots & 0 \\ \dots & \dots & \dots & \dots & \dots \\ 0 & \dots & 0 & \dots & w_N \end{pmatrix}$$

by the transformation  $W = V^{-1}UV$ , or equivalently  $U = VWV^{-1}$  [4].

Thus, the probability to be in state  $i$  at time  $t$  is

$$p_i(t) = \sum_{j=1}^N a_j v_i^j \exp w_j t = \sum_{j=1}^N (V^{-1})_{j1} V_{ij} e^{w_j t} = (V e^{Wt} V^{-1})_{i1} = (e^{Ut})_{i1} \quad (13)$$

and in particular,

$$p_N(t) = (e^{Ut})_{N1} \quad (14)$$

The probability flow to exit to the right is  $r_o p_N(t)$ , and the total probability of exit to the right is

$$P_{\rightarrow} = r_o \int_0^{\infty} p_N(t) dt = -r_o \sum_{j=1}^N a_j v_N^j \frac{1}{w_j} = -r_o \sum_{j=1}^N (V^{-1})_{j1} V_{Nj} \frac{1}{w_j} (VW^{-1}V^{-1})_{N1} = -r_o U_{N1}^{-1} \quad (15)$$

in agreement with equation (2) in the Letter. This result can be also obtained using the following reasoning. Instead of considering a single particle hopping through the states, starting at the position 1, let us consider the steady state where a flux  $J$  enters to a position 1, with a steady state probability distribution  $\vec{p}$ . Then the probability to exit to the right is the ratio of the transmitted flux to the entrance flux:  $r_o p_N/J$ . We have

$$0 = \hat{U} \cdot \vec{p} + \vec{J} \quad (16)$$

and therefore  $\vec{p} = -U^{-1} \cdot \vec{J}$  so that  $p_N = -U_{N1}^{-1}$  because  $J_i = J\delta_{i,1}$ .

The probability distribution of exit times to the right is simply  $r_o p_N(t)$  [3] and any moment of it can be calculated easily. For instance, the mean first passage time to exit to the right is:

$$\bar{T}_{\rightarrow} = r_o \int_0^{\infty} t P_N(t) dt = r_o \sum_{j=1}^N (V^{-1})_{j1} V_{Nj} \frac{1}{w_j^2} = r_o (V(W^2)^{-1}V^{-1})_{N1} = r_o (U^2)_{N1}^{-1} \quad (17)$$

in agreement with the equation (3) in the Letter.

### Steady state

In the case of current  $J$  impinging on the channel entrance, one can describe the system in terms of average site occupancies  $n_i$ , whose kinetics is described in the mean field approximation by the following equations [5–7].

$$\frac{d}{dt} n_i = r n_{i-1} \left(1 - \frac{n_i}{m}\right) + r n_{i+1} \left(1 - \frac{n_i}{m}\right) - r n_i \left(1 - \frac{n_{i-1}}{m}\right) - r n_i \left(1 - \frac{n_{i+1}}{m}\right) = r(n_{i-1} + n_{i+1} - 2n_i) \quad \text{for } 1 < i < N. \quad (18)$$

where  $m$  is the maximal site occupancy. The boundary conditions at sites 1 and  $N$  are

$$\begin{aligned}\frac{d}{dt}n_1 &= -(r + r_o)n_1 + rn_2 + J\left(1 - \frac{n_1}{m}\right) \\ \frac{d}{dt}n_N &= -(r + r_o)n_N + rn_{N-1}.\end{aligned}\tag{19}$$

In a matrix form:

$$\frac{d}{dt}|n(t)\rangle = \hat{M}^J \cdot |n(t)\rangle + \vec{J}\tag{20}$$

where the matrix  $\hat{M}^J$  is the same as  $\hat{M}$  with the only change  $\hat{M}_{1,1}^J = -J/m - r - r_o$  and  $\vec{J} = (J, 0, \dots, 0)$ . Note that for an internally uniform channel (as the one described in Fig. 1) the mean-field equations (Eqs. (18,20)) are exact [5, 6].

The steady state density profile can be obtained from Eq. (20) as  $|n\rangle^{ss} = -\left(\hat{M}^J\right)^{-1} \cdot \vec{J}$ , or more specifically as:

$$n_i^{ss} = \frac{J\left(1 + (N - i)\frac{r_o}{r}\right)}{r_o\left(2 + (N - 1)\frac{r_o}{r}\right) + \frac{J}{m}\left(1 + (N - 1)\frac{r_o}{r}\right)}.\tag{21}$$

The average exit flux to the right is  $J_{\rightarrow} = r_o n_N^{ss}$ . This together with Eq. (21) yield the probability of an individual particle within the flux to exit to the right:

$$P_{\rightarrow}^{ss} = \frac{J_{\rightarrow}}{J(1 - n_1/m)} = \frac{1}{2 + (N - 1)r_o/r}.\tag{22}$$

As already established before, the exit probability of individual particles to exit to the right is the same as in the single-particle case (at least for uniform channels), even though they are interfering with each other's passage through the channel [7].

However, crowding does influence transport and is manifested in obstruction of the entrance site. The transport *efficiency*, defined as the ratio of the exit flux to the right  $J_{\rightarrow}$  to the total impinging flux  $J$ ,  $\text{Eff}_{\rightarrow} = \frac{J_{\rightarrow}}{J}$ , decreases with  $J$  due to jamming at the entrance.

$$\text{Eff}_{\rightarrow} = \frac{J_{\rightarrow}}{J} = \frac{r_o}{2r + (N - 1)r_o + J(1 + (N - 1)r_o/r)/m}.\tag{23}$$

**Derivation of the analytical expressions for the mean exit times in the jammed regime**

The boundary conditions of equation (8) of the Letter, describing the probability of the tagged particle are:

$$\begin{aligned}\frac{d}{dt}p_1 &= -r_o p_1 - r p_1(1 - n_2^{ss}/m) + r p_2(1 - n_1^{ss}/m) \\ \frac{d}{dt}p_N &= -r_o p_N - r p_N(1 - n_{N-1}^{ss}/m) + r p_{N-1}(1 - n_N^{ss}/m)\end{aligned}\quad (24)$$

Using the matrix form of Eq. (9) of the paper, the elements of the matrix  $M^{ss}$  are given by

$$M_{i,i}^{ss} = -r(2 - n_{i-1}^{ss}/m - n_{i+1}^{ss}/m) = -2r(1 - n_i^{ss}/m); \quad \text{and} \quad M_{i,i\pm 1}^{ss} = r(1 - n_i^{ss}/m) \quad \text{for} \quad 1 < i < N, \quad (25)$$

and

$$M_{1,1}^{ss} = -r(1 - \frac{n_1^{ss}}{m}) - r_o; \quad M_{N,N}^{ss} = -r(1 - \frac{n_{N-1}^{ss}}{m}) - r_o; \quad M_{1,2}^{ss} = r(1 - \frac{n_1^{ss}}{m}); \quad M_{N,N-1}^{ss} = r(1 - \frac{n_N^{ss}}{m}) \quad (26)$$

The average (over particles actually exited to the left) time to exit to the left is

$$\bar{T}_{\leftarrow}^{ss} = r_o \langle 1 | ((M^{ss})^{-1})^2 | 1 \rangle / P_{\leftarrow}, \quad (27)$$

where

$$P_{\leftarrow} = 1 - P_{\rightarrow} = \frac{1 + (N-1)r_o/r}{2 + (N-1)r_o/r}. \quad (28)$$

In order to obtain an explicit expression for  $\bar{T}_{\leftarrow}^{ss}$  we define

$$|W\rangle = D (M^{ss})^{-1} |1\rangle \quad (29)$$

and

$$\langle Q| = D \langle 1| (M^{ss})^{-1}. \quad (30)$$

In the equations above we introduced the notation for the determinant of  $M^{ss}$ ,  $D \equiv \det(M^{ss})$ . The elements of these vectors are given by

$$W_n = r^{N-2} (A_N r + n B_N r + (N-n)r_o) \prod_{k=2}^{N-1} (A_N + k B_N) \quad (31)$$

and

$$Q_n = r^{N-2} (A_N r + n B_N r + (N-n)r_o) \frac{\prod_{k=1}^{N-1} (A_N + k B_N)}{A_N + n B_N}. \quad (32)$$

In the above expressions

$$A_N = \frac{r_o(2r + (N-1)r_o - J/m)}{(J/m)(r + (N-1)r_o) + r_o(2r + (N-1)r_o)} \quad (33)$$

and

$$B_N = \frac{Jr_o/m}{(J/m)(r + (N-1)r_o) + r_o(2r + (N-1)r_o)}. \quad (34)$$

The mean escape time to the left is then

$$\bar{T}_{\leftarrow}^{ss} P_{\leftarrow} = \frac{r_o}{D^2} \sum_{n=1}^N W_n Q_n = \frac{r_o}{D^2} \sum_{n=1}^N r^{2N-4} (A_N r + n B_N r + (N-n)r_o)^2 \frac{(A_N + B_N)}{A_N + n B_N} \prod_{k=2}^{N-1} (A_N + k B_N)^2. \quad (35)$$

Using the notations above we can express  $D$  as:

$$D = r^{N-2} r_o (2A_N r + (N+1)B_N r + (N-1)r_o) \prod_{k=2}^{N-1} (A_N + k B_N). \quad (36)$$

Substituting  $D$  into the expression for  $\bar{T}_{\leftarrow}^{ss}$  one obtains

$$\bar{T}_{\leftarrow}^{ss} P_{\leftarrow} = \frac{(A_N + B_N) \sum_{n=1}^N \frac{(A_N r + n B_N r + (N-n)r_o)^2}{A_N + n B_N}}{r_o (2A_N r + (N+1)B_N r + (N-1)r_o)^2}. \quad (37)$$

Performing the summation, we get for the average time to exit the channel to the left

$$\begin{aligned} \frac{\bar{T}_{\leftarrow}^{ss} P_{\leftarrow}}{(A_N + B_N)} &= \frac{(N(B_N r - r_o)(2A_N(B_N r + r_o) + B_N(B_N(N+1)r + (3N-1)r_o)))}{2B_N^2 r_o (2A_N r + (N+1)B_N r + (N-1)r_o)^2} \\ &+ \frac{r_o(A_N + N B_N)^2 \left( \psi\left(\frac{A_N}{B_N} + N + 1\right) - \psi\left(\frac{A_N + B_N}{B_N}\right) \right)}{B_N^3 (2A_N r + (N+1)B_N r + (N-1)r_o)^2}. \end{aligned} \quad (38)$$

Here  $\psi(x) = \frac{d \ln(\Gamma(z))}{dz} \Big|_{z=x}$ , where  $\Gamma(x)$  is the  $\gamma$ -function.

Substituting the expressions for  $A_N$  and  $B_N$ , we get the explicit expression for the average time as

$$\begin{aligned} \bar{T}_{\leftarrow}^{ss} &= - \frac{N(2r_o(2r + r_o(N-1)) + \frac{J}{m}(4r + 3r_o(N-1)))}{2(J/m)^2(r + r_o(N-1))} \\ &+ \frac{(J/m)(r + r_o(N-1)) + r_o(2r + r_o(N-1))}{(J/m)^3 r_o(r + r_o(N-1))} \left( \psi\left(N + \frac{2r + (N-1)r_o}{J/m}\right) - \psi\left(\frac{2r + (N-1)r_o}{J/m}\right) \right). \end{aligned} \quad (39)$$

In the Letter we use the definitions of the probabilities to exit to the right/left in order to simplify this cumbersome expression. In the single particle limit,  $J \rightarrow 0$ , the expression for

$\overline{T}_{\leftarrow}^{ss}$  reduces to the previously obtained single particle expression (Eq. (6) in the paper). At the other extreme when the input flux  $J \rightarrow \infty$ , the mean escape time is

$$\lim_{J \rightarrow \infty} \overline{T}_{\leftarrow}^{ss} = \frac{r + (N - 1)r_o}{r_o(2r + (N - 1)r_o)} = \frac{P_{\leftarrow}}{r_o}. \quad (40)$$

The mean time to exit to the right and the mean trapping time can be obtained in a similar fashion.

- 
- [1] S. Redner, *A guide to first-passage processes* (Cambridge University Press, 2001).
  - [2] M. Gardiner, *Stochastic Processes in Physics, Chemistry and Biology* (Springer-Verlag, 2003).
  - [3] A. Berezhkovskii and S. M. Bezrukov, *Chem. Phys.* **319**, 342 (2005).
  - [4] G. Arfken, H. Weber, *Mathematical methods for physicsists, 4th ed.* (Academic Press, San Diego, 1995).
  - [5] G. M. Schütz, *Diffusion Fundamentals* **2**, 5 (2005).
  - [6] T. Chou, *Phys. Rev. Lett.* **80**, 85 (1998).
  - [7] A. Zilman, *Biophys. J.* **96**, 1235 (2008).
